# Supplementary material for: Increase in Double Negative B Lymphocytes in Patients with Systemic Lupus Erythematosus in Remission and Their Correlation with Early Differentiated T Lymphocyte Subpopulations
Source: MDPI journal article supplement (doi:10.3390/cimb45080421), 2023-08-13
Supplement: s1 [file s1]

**Supplement Table S1.** Clinical and laboratory findings of patients with LN at time of diagnosis and time of evaluation

|                                                                 | <b>SLE patients</b> | <b>Healthy controls</b> |
|-----------------------------------------------------------------|---------------------|-------------------------|
| n                                                               | 30                  | 31                      |
| Age (yrs)                                                       | 43±14               | 49±13                   |
| M/W                                                             | 1/29                | 15/16                   |
| Time since diagnosis (mo)                                       | 84(45-125)          |                         |
| SLEDAI score                                                    | 2(1-5)              |                         |
| SLE manifestations and Systems involved                         |                     |                         |
| • Skin and mucosal involvement                                  | 13/30 (43.3%)       |                         |
| • Musculoskeletal system                                        | 7/30 (23.3%)        |                         |
| • Respiratory system                                            | 0/30 (0%)           |                         |
| • Cardiovascular system                                         | 1/30 (3.3%)         |                         |
| • Haematological disorders                                      | 3/30 (10%)          |                         |
| • Kidney involvement                                            | 22/30 (73.3%)       |                         |
| • Neuropsychiatric disorders                                    | 3/30 (10%)          |                         |
| • Immunological/serological disorders                           | 16/30 (53.3%)       |                         |
| <b>Renal Pathology Classification according to ISN/RPS 2003</b> |                     |                         |
| Stage II                                                        | 3/30 (10%)          |                         |
| Stage III                                                       | 3/30 (10%)          |                         |
| Stage IV                                                        | 14/30 (46.7%)       |                         |
| Stage V                                                         | 7/30 (23.3%)        |                         |
| Stage III+V                                                     | 3/30 (10%)          |                         |

|                                         |   | CD19IgD-CD27- |        |                              |   | CD19IgD-CD27- |        |
|-----------------------------------------|---|---------------|--------|------------------------------|---|---------------|--------|
|                                         |   | SLE           | HC     |                              |   | SLE           | HC     |
| CD4                                     | r | 0.548         | 0.412  | CD8                          | r | 0.425         | -0.239 |
|                                         | p | 0.002         | 0.021  |                              | p | 0.019         | 0.196  |
| Early Differentiated cells              |   |               |        |                              |   |               |        |
| CD4 CD31+                               | r | 0.587         | 0.243  | CD8 CD31+                    | r | 0.366         | -0.286 |
|                                         | p | <0.001        | 0.188  |                              | p | 0.047         | 0.119  |
| CD4 NAïVE<br>(CD45RA+ CCR7+)            | r | 0.325         | 0.189  | CD8 NAïVE<br>(CD45RA+ CCR7+) | r | 0.432         | -0.308 |
|                                         | p | 0.079         | 0.316  |                              | p | 0.017         | 0.091  |
| CD4CD45RA+CD28+                         | r | 0.504         | 0.265  | CD8CD45RA+CD28<br>+          | r | 0.234         | -0.086 |
|                                         | p | 0.005         | 0.15   |                              | p | 0.214         | 0.646  |
| CD4CD45RA+CD57-                         | r | 0.419         | 0.42   | CD8CD45RA+CD57-              | r | 0.201         | -0.251 |
|                                         | p | 0.021         | 0.021  |                              | p | 0.287         | 0.173  |
| CD4CD45RA-CD57-                         | r | 0.397         | 0.24   | CD8CD45RA-CD57-              | r | 0.444         | 0.166  |
|                                         | p | 0.03          | 0.201  |                              | p | 0.014         | 0.371  |
| CD4CD28+CD57-                           | r | 0.487         | 0.439  | CD8CD28+CD57-                | r | 0.363         | -0.088 |
|                                         | p | 0.006         | 0.013  |                              | p | 0.048         | 0.638  |
| CD4CD28+CD57+                           | r | 0.491         | 0.156  | CD8CD28+CD57+                | r | 0.483         | -0.092 |
|                                         | p | 0.006         | 0.402  |                              | p | 0.007         | 0.624  |
| Memory cells                            |   |               |        |                              |   |               |        |
| CD4 CM (CD45RA-<br>CCR7+)               | r | 0.381         | 0.188  | CD8 CM (CD45RA-<br>CCR7+)    | r | 0.33          | 0.138  |
|                                         | p | 0.038         | 0.32   |                              | p | 0.075         | 0.459  |
| CD4 EM (CD45RA-<br>CCR7-)               | r | -0.075        | 0.008  | CD8 EM (CD45RA-<br>CCR7-)    | r | 0.099         | 0.088  |
|                                         | p | 0.695         | 0.965  |                              | p | 0.601         | 0.637  |
| Senescent/Advanced differentiated cells |   |               |        |                              |   |               |        |
| CD4 EMRA (CD45RA+<br>CCR7-)             | r | 0.104         | 0.168  | CD8 EMRA<br>(CD45RA+CCR7-)   | r | 0.242         | 0.04   |
|                                         | p | 0.583         | 0.376  |                              | p | 0.189         | 0.182  |
| CD4CD28null                             | r | 0.066         | -0.154 | CD8CD28null                  | r | 0.271         | -0.248 |

|                              |   |         |        |                              |   |       |        |
|------------------------------|---|---------|--------|------------------------------|---|-------|--------|
|                              | p | 0.73    | 0.408  |                              | p | 0.147 | 0.179  |
| CD4CD28-CD57+                | r | - 0.068 | -0.243 | CD8CD28-CD57+                | r | 0.291 | -0.254 |
|                              | p | 0.722   | 0.187  |                              | p | 0.119 | 0.169  |
| CD4 EMRA (CD45RA+ CCR7-) 28- | r | 0.042   | 0.198  | CD8 EMRA (CD45RA+ CCR7-) 28- | r | 0.191 | -0.032 |
|                              | p | 0.825   | 0.294  |                              | p | 0.312 | 0.862  |

**Supplement Table S2.** Correlation of the number of DN B cells with the whole cohort of CD4 and CD8 lymphocytes and their subpopulations.

### Supplement Figure Legends

**Suppl. Figure S1.** Gating strategy for CD4 and CD8 cells, and their subsets, based on the presence of CD45RA, CCR7, CD31, CD57 and CD28

**Suppl. Figure S2.** Gating strategy for CD19+ cells, and their subsets based on the presence of IgD and CD27
