# Supplementary figures and images for: Increase in Double Negative B Lymphocytes in Patients with Systemic Lupus Erythematosus in Remission and Their Correlation with Early Differentiated T Lymphocyte Subpopulations
Source: MDPI journal article supplement (doi:10.3390/cimb45080421), 2023-08-13

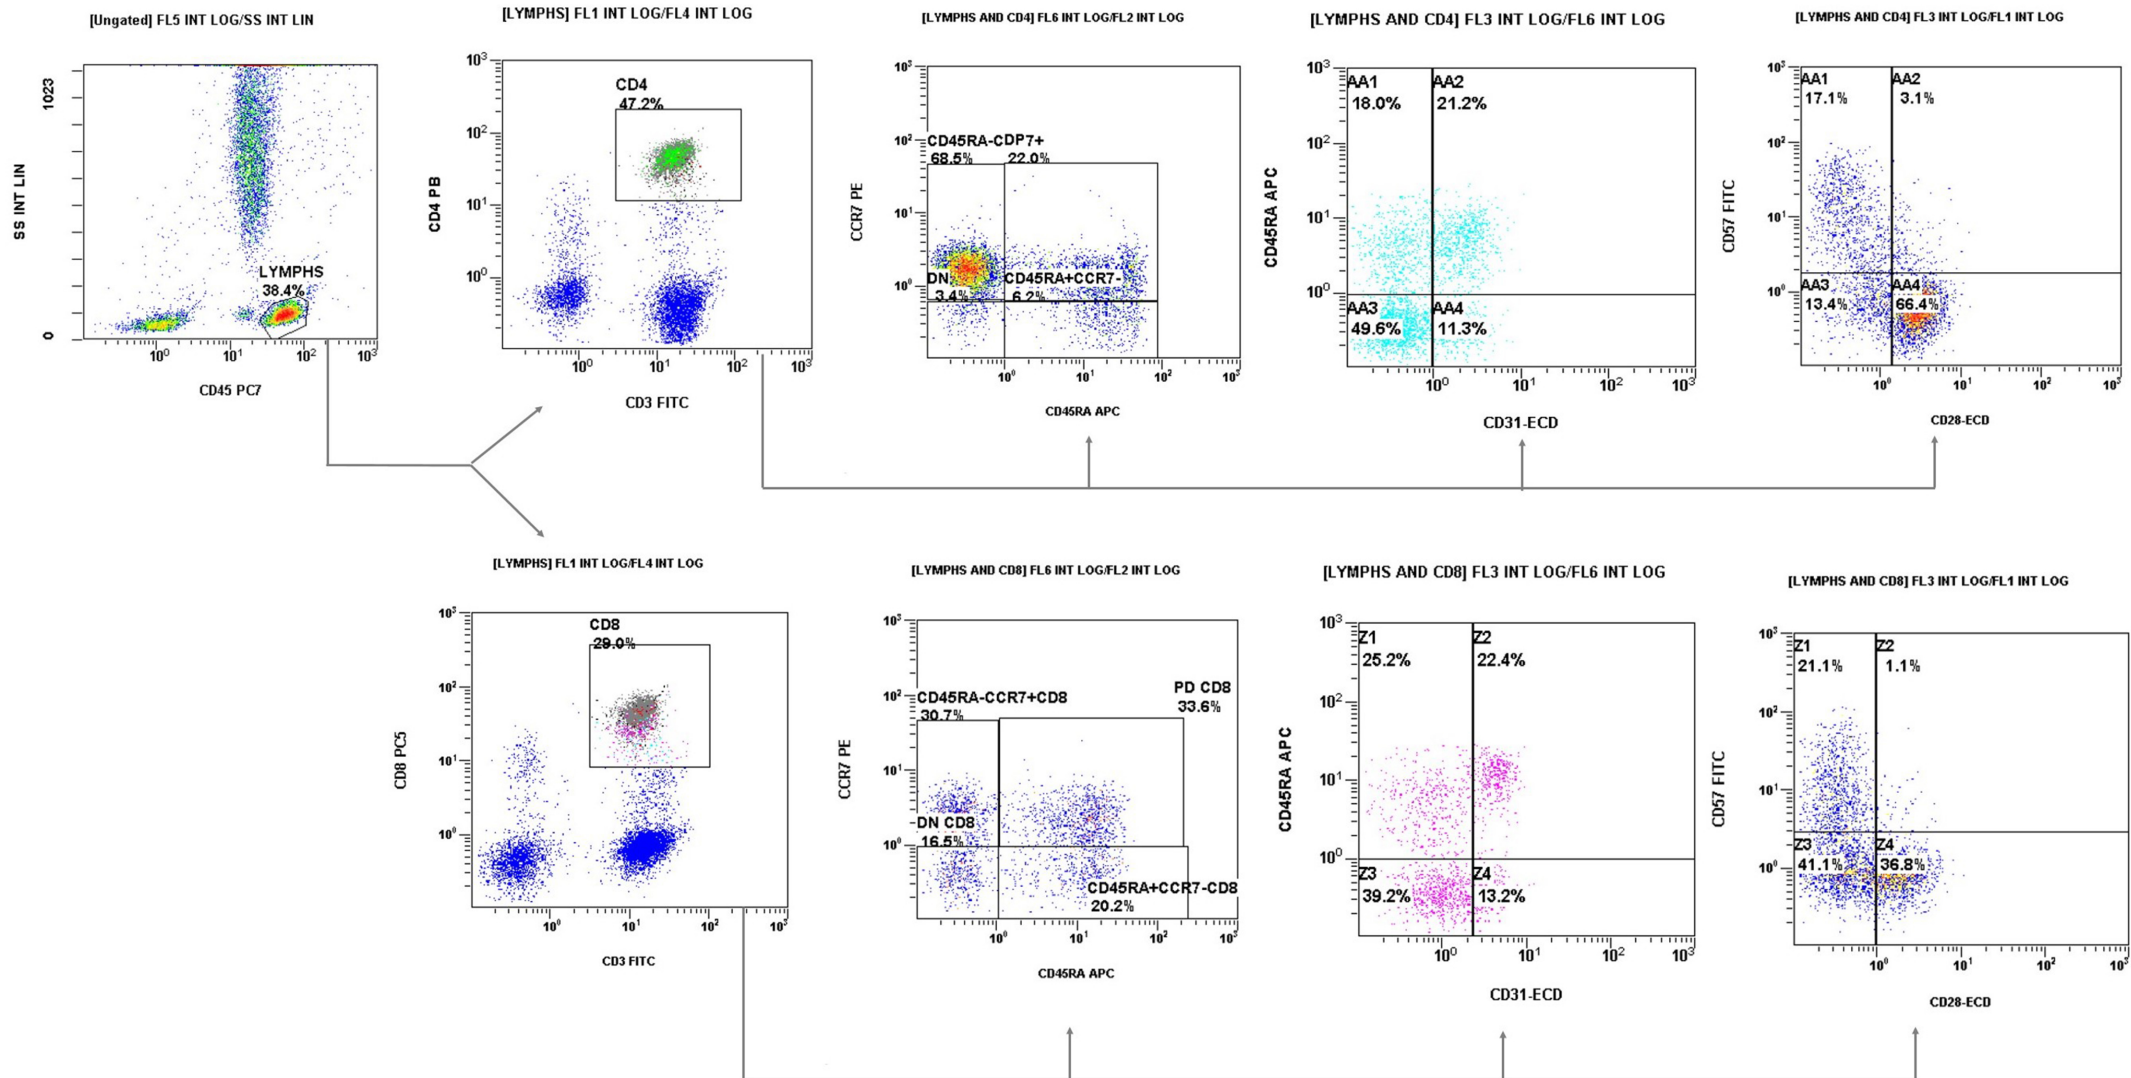

Supplement: s1 [file s1]

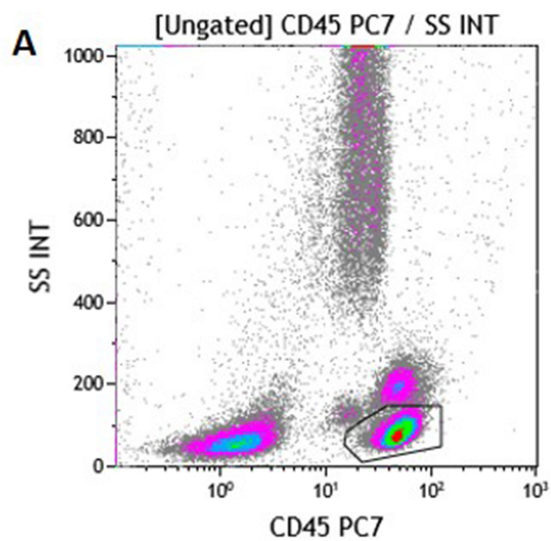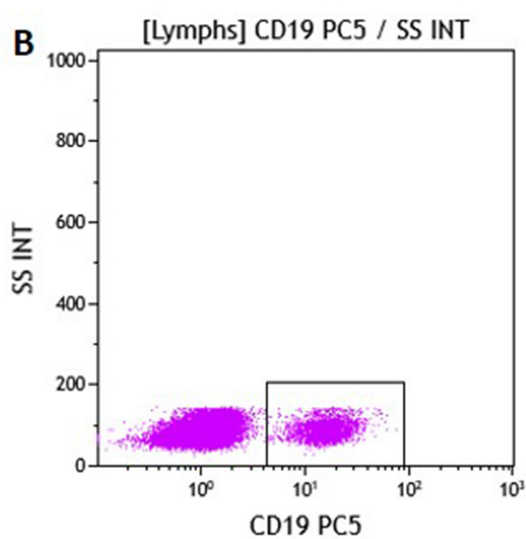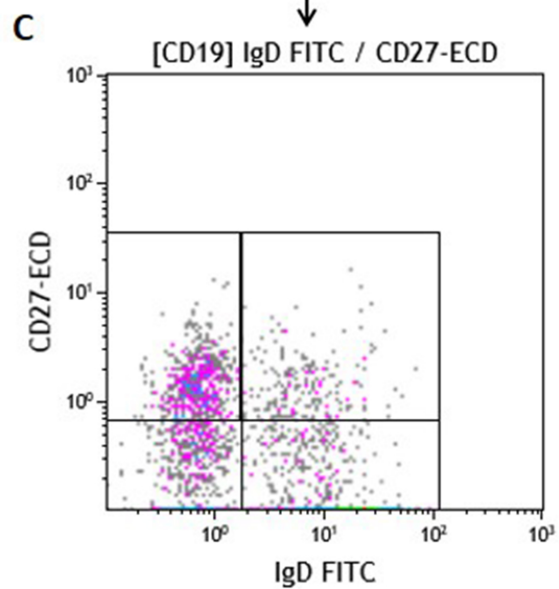

Supplement: s1 [file s1]
